# Supplementary material for: Death With Function and Graft Failure After Kidney Transplantation: Risk Factors at Baseline Suggest New Approaches to Management
Source: PubMed Central journal article supplement (PMC8759617; doi:10.1097/txd.0000000000001273), 2022-01-13
Supplement: txd-8-e1273-s001.pdf [file txd-8-e1273-s001.pdf]

## **Supplementary Data. Causes of Kidney Allograft Loss**

### **Table of Content**

|                                                                                                                                  |               |
|----------------------------------------------------------------------------------------------------------------------------------|---------------|
| <b>Supplementary Methods .....</b>                                                                                               | <b>2-9</b>    |
| <b>Table S1 Timeline of graft loss, death with functioning graft .....</b>                                                       | <b>10</b>     |
| <b>Table S2 Multivariable Analysis of cardiac causes for death with functioning graft...</b>                                     | <b>11</b>     |
| <b>Table S3. Multivariable Analysis for malignancy as a cause for death with functioning graft.....</b>                          | <b>12</b>     |
| <b>Table S4. Multivariable Analysis for infection as a cause for death with functioning graft.....</b>                           | <b>13</b>     |
| <b>Table S5. Assignment and agreement of causes of graft loss between physicians.....</b>                                        | <b>14</b>     |
| <b>Table S6 Specific causes of death censored graft loss.....</b>                                                                | <b>15 -16</b> |
| <b>Table S7 Multivariable analysis for all Death Censored Graft.....</b>                                                         | <b>17</b>     |
| <b>Table S8 Multivariable analysis for Alloimmune Causes .....</b>                                                               | <b>18</b>     |
| <b>Table S9. Multivariable analysis for Renal Tubular Injuries Causes.....</b>                                                   | <b>19</b>     |
| <b>Table S10 Multivariable Analysis for overall death with functioning graft.....</b>                                            | <b>20</b>     |
| <b>Table S11. Baseline Characteristic comparison between the ones with known cause of death and unknown cause of death .....</b> | <b>21</b>     |
| <b>Figure S1. Flowchart study population.....</b>                                                                                | <b>22</b>     |
| <b>Figure S2 Causes of Death Censored Graft Loss during time.....</b>                                                            | <b>23</b>     |
| <b>Figure S3. Comparison of Causes of Allograft Failure in Two Eras.....</b>                                                     | <b>24</b>     |

## **Supplementary Data.**

### **1. Supplementary Methods**

#### **Follow up protocol**

Patients in this study were followed using a common protocol that included both surveillance biopsies at 4-8 months, 1 year, 2 years, 4-5 year and 8-10 years and biopsies for cause. Patient also had laboratory follow up: in the first year weekly early than monthly, after one-year laboratory tests were obtained every 3-6 months. Initial maintenance regimen was primarily tacrolimus, mycophenolate mofetil (MMF), +/- prednisone.

### **2. Determining the cause of GF.**

#### **A. Definitions of the causes of graft loss**

- 1) Alloimmune causes of graft losses were classified by using Banff Classification 2017 criteria for acute active antibody mediated rejection and chronic active mediated rejection. Cellular rejection was determine by having acute cellular rejection or borderline rejection or chronic T cell rejection in the absence of antibody mediated injury.
  - a) T cell Rejection was defined by having Acute Cellular Rejection or chronic active cellular rejection: It was defined by acute cellular rejection or chronic cellular rejection or borderline cellular rejection in biopsy or documentation in the electronic medical chart in the absence of antibody mediated injury or documentation of it.

- b) Acute Active Antibody-Mediated Rejection was defined as acute active antibody mediated injury as per Banff 2017 in the absence of cellular rejection or documentation of it.
  - c) Mixed Acute Cellular Rejection and Active Antibody-Mediated Rejection: It was defined as having a combination of a) and b) in biopsy or documentation of it.
  - d) Chronic Active Antibody-Mediated Rejection was defined as having chronic active antibody mediated rejection by Banff 2017 or documentation of transplant glomerulopathy or chronic antibody mediated rejection but in the absence any cellular rejection component in last biopsy.
  - e) Chronic Active Antibody-Mediated Rejection with cellular component: It was defined as having a combination of a) and d) in biopsy or documentation of it definitions or documentation of it.
- 2) Glomerular Cause were assigned etiologies that are non-alloimmune that affect the glomeruli.
- a) Recurrence glomerulonephritis was defined as a recurrent glomerular disease same as native that leads to allograft loss.
  - b) De novo glomerular diseases were classified as having new onset glomerular disease after transplantation that leads to graft loss.
  - c) Diabetic nephropathy was defined as diabetic nephropathy as the cause of renal allograft loss.
  - d) Thrombotic microangiopathy defined as the pathological lesion thrombotic microangiopathy that leads to graft loss that is not associated with alloimmune injury.

- 3) Renal Tubular Injury Causes were attributed to systemic illness leading to either acute or repeated acute kidney injury which progressed to allograft failure, for example sepsis with hypotension and non-recovered kidney function, repeat urinary tract infections without other cause of allograft injury determined by clinical that were accompanied with or without histology
- a) An episode of acute tubular necrosis: It was defined when one episode with acute tubular necrosis lead to graft loss.
  - b) Recurrent episode of acute tubular necrosis due to infection: It was defined as having recurrent episodes of acute kidney injury due to infection
  - c) Recurrent episode of acute tubular necrosis due to hypovolemia: It was defined as having recurrent episodes of acute kidney injury due to infection
  - d) Nephrotoxic Medication was defined as any tubular injury caused by other medication that is not a calcineurin inhibitor.
  - e) Calcineurin inhibitor toxicity= renal failure due to calcineurin inhibitor without a second insult.
  - f) Oxalate nephropathy= Allograft failure due to oxalate nephropathy
  - g) Other recurrent episodes acute tubular necrosis: Recurrent episodes of acute tubular necrosis.
  - h) Secondary to cardiorenal syndrome: Renal failure due to cardiorenal syndrome causing renal allograft failure.
  - i) Secondary to hepatorenal syndrome: Renal failure due to hepatorenal syndrome causing renal allograft failure.

- 4) Surgical complication defined as grafts that never had a good function or either had a technical complication that lead to graft failure in the first year.
  - a) Vascular Thrombosis= Graft loss causes either by arterial or vein thrombosis of the renal allograft
  - b) Bleeding: Graft loss caused by bleeding
  - c) Urological complication: Any surgical complication that involves the ureter or bladder
  - d) Other complication secondary to infection: Surgical complication that lead infection leading to graft loss
  - e) Vascular atherosclerosis: Atherosclerosis of the artery that lead to graft loss the first year
  - f) Primary Dysfunction was defined as a graft that never had any function
- 5) BK nephropathy= was defined as the cause that had biopsy proven BK nephropathy that either was active (in the last biopsy) or inactive (negative in the last biopsy) but had chronic lesions.
  - a) Active BK nephropathy= This is due to active lesion of BK nephropathy
  - b) Inactive BK nephropathy= This is due chronic lesions BK nephropathy but not active in the last biopsy.
- 6) Others: Other causes were assigned in the different subcategories that were unable to group.
  - a) Unknown causes was assigned to causes that were lack of sufficient clinical, laboratory data or evidence for graft loss.

- b) Atherosclerosis vascular disease: are the causes due to atherosclerosis of the vessels that cause graft loss after 1 year
- c) Suboptimal kidney function that survive greater than 1 year: Kidney allograft that never had a good renal function but that failed after one year of transplant.
- d) Severe Arteriolar hyalinosis (without any other cause) was defined as arteriolar hyalinosis of the allograft that is not associated with other cause.
- e) Malignancy in the allograft= It was defined as a malignancy in the renal or urothelial of the allograft that lead to nephrectomy.

### **B. Causes of Definition of Death with functioning graft**

The causes of death with functioning allograft were determined by a transplant nephrologist that did electronic medical chart review of the causes of death with functioning. They were classified in the different categories

- a) Cardiac: Defined as the cause of death due to a cardiac cause.
- b) Malignancy: Defined as the cause of death due to malignancy.
- c) Infection: Defined as the cause of death due to infection.
- d) Unknown: Defined as death without unknown cause either due to lack of information or documentation to reach to the cause.
- e) Others: All other causes that are not applicable of prior causes of death. Between the other causes were stroke, trauma, bleeding, pulmonary causes, neurological causes, pancreatitis, liver failure or complications renal failure that went for palliative care option without any renal replacement therapy.

### **C. Definitions of the variables**

These are the definitions of our variables:

- 1) Diabetes Mellitus as a cause of pretransplant ESRD was defined by documentation diagnosis as diabetes mellitus as the cause of native kidney disease.
- 2) Delayed Graft Functioning was defined as any dialysis required in the first week after transplantation obtained from the UNOS STAR data.
- 3) Calculated Panel Reactive Antigen score (cPRA) was obtained from UNOS STAR data reported pretransplant.

### **Clinical Characteristics of the variables from death censored graft loss**

- 4) History of any episode of T cell mediated rejection= Any T cell rejection by Banff 2017 including borderline cellular rejection or chronic active T cell mediated rejection or description from outside study. This data was obtained by data abstraction for only the patients with death censored graft loss.
- 5) History of any episode of acute antibody mediated rejection= Antibody mediated rejection by Banff Classification 2017 during the transplant period regardless if the biopsy has transplant glomerulopathy (cg) or description from outside study. This data was obtain by data abstraction for only the patients with death censored graft loss.
- 6) History of any episode of Chronic Antibody Mediated rejection = any transplant glomerulopathy (cg) in kidney biopsy during the transplant period or description from outside study. This data was obtained by data abstraction for only the patients with death censored graft loss.

- 7) History of Non-skin cancer= Any malignancy other from skin source during the transplant period. This data was obtain by data abstraction for only the patients with death censored graft loss.
- 8) BK viremia was defined as having any serum BK or documentation of it during the transplant period. This data was obtain by data abstraction for only the patients with death censored graft loss.
- 9) CMV viremia was defined as having any serum CMV or documentation of it during the transplant period. This data was obtain by data abstraction for only the patients with death censored graft loss.
- 10) History of recurrent/chronic diarrhea= Any diarrhea that has 4 weeks of diarrhea in a year or having equal or greater than 3 episodes of diarrhea during a year. This data was obtain by data abstraction for only the patients with death censored graft loss.
- 11) Noncompliance = Description or documentation referring that the patient is noncompliant, no adherent, missing doses or skipping doses of immunosuppression in the medication This data was obtain by data abstraction for only the patients with death censored graft loss.
- 12) Immunosuppression decreased by provider was defined as:
  - a. Reduction of mycophenolic mofetil or mycophenolic acid (MPA) dose lower than <500mg PO BID or 360 mg PO BID or holding/discontinuing the antimetabolite for any cause. (Example BK nephropathy, malignancy)
  - b. Decrease in calcineurin inhibitor target through goal level (cyclosporine or tacrolimus target through level) or discontinuation without substitution.



c. Change of mycophenolic mofetil or mycophenolic acid to azathioprine (AZT).

13) De novo Donor Specific Antibodies= New donor specific antibodies that are donor specific antibodies with an MFI greater than 1000 after transplantation or documentation from outside facility that the patient had de novo DSA.

**Table S1 Timeline Of Graft Loss And Death With Functioning Graft**

| <b>Status of the transplant</b>                  | <b>Up to 1 year follow up</b> | <b>Up to 5 years follow up</b> | <b>Greater than 5 years follow up</b> | <b>Overall</b> |
|--------------------------------------------------|-------------------------------|--------------------------------|---------------------------------------|----------------|
| DWFG                                             | 85 (1.5%)                     | 399 (6.9%)                     | 647 (11.25%)                          | 691 (12.0%)    |
| Graft failed                                     | 131 (2.3%)                    | 365 (6.3%)                     | 527 (9.16%)                           | 553 (9.6%)     |
| Active (Last follow up <1 year from censor date) | 53 (93.8%)                    | 1605 (64.6%)                   | 1150 (50.85%)                         | 2808(48.8%)    |
| Active (Last follow up ≥1 year from censor date) | 140 (2.4%)                    | 1132 (22.1%)                   | 428 (28.74%)                          | 1700 (29.6%)   |

**Table S2 Multivariable Analysis of cardiac causes for death with functioning graft**

| Cardiac Cause of death                                            | Unadjusted |           |         | Adjusted* |           |         |
|-------------------------------------------------------------------|------------|-----------|---------|-----------|-----------|---------|
|                                                                   | HR         | 95% CI    | P-value | HR        | 95% CI    | P-value |
| Clinical Characteristics                                          |            |           |         |           |           |         |
| Age, 10 years                                                     | 1.68       | 1.38-2.03 | <0.001  | 1.57      | 1.28-1.92 | <0.001  |
| Sex (Male)                                                        | 1.65       | 1.04-2.63 | 0.034   | 1.43      | 0.89-2.28 | 0.135   |
| Deceased Donor                                                    | 1.19       | 0.78-1.82 | 0.428   | -         | -         | -       |
| Period 2006-2009                                                  | 1.00       | Ref       | Ref     | 1.00      | Ref       | Ref     |
| Period 2010-2013                                                  | 0.66       | 0.39-1.12 | 0.125   | -         | -         | -       |
| Period 2014-2018                                                  | 0.79       | 0.40-1.56 | 0.502   | -         | -         | -       |
| Prior Kidney Transplant                                           | 0.79       | 0.36-1.70 | 0.541   | -         | -         | -       |
| Dialysis                                                          | 0.97       | 0.63-1.50 | 0.895   | -         | -         | -       |
| Prednisone Therapy                                                | 1.12       | 0.73-1.71 | 0.615   | -         | -         | -       |
| Induction<br>(thymoglobulin and<br>antiCD25) vs.<br>(Alemtuzumab) | 1.45       | 0.87-2.41 | 0.151   | -         | -         | -       |
| Donor age, 10 years                                               | 1.04       | 0.89-1.21 | 0.647   | -         | -         | -       |
| Donor Gender                                                      | 0.82       | 0.54-1.25 | 0.355   | -         | -         | -       |
| HLA number Mismatch<br>(A, B, DR)                                 | 0.10       | 0.98-1.26 | 0.116   | -         | -         | -       |
| Donor Black race                                                  | 0.79       | 0.32-1.96 | 0.614   | -         | -         | -       |
| Recipient Black race                                              | 1.17       | 0.64-2.16 | 0.603   | -         | -         | -       |
| Diabetes Mellitus as<br>Cause of ESRD                             | 3.58       | 2.34-5.49 | <0.001  | 2.69      | 1.74-4.18 | <0.001  |
| Delayed Graft Function                                            | 1.76       | 1.05-2.94 | 0.031   | 1.44      | 0.85-2.42 | 0.174   |
| HLA A, B mismatch                                                 | 1.10       | 0.93-1.30 | 0.267   | -         | -         | -       |
| HLA DR Mismatch                                                   | 1.34       | 0.99-1.81 | 0.061   | -         | -         | -       |
| CPRA $\geq$ 80% (only in<br>4941)                                 | 1.35       | 0.58-3.15 | 0.492   | -         | -         | -       |

ESRD: End Stage Renal Disease; DGF: Delayed Graft Function; CPRA: Calculated Panel Reactive Antibody; HLA: Human Leukocyte Antigen.

\* Adjusted for recipient age, sex, delayed graft functioning, diabetes mellitus as a cause pre-transplant of ESRD

**Table S3. Multivariable Analysis for malignancy as a cause for death with functioning graft**

| Malignancy As Cause Of Death                             | Unadjusted |           |         | Adjusted* |           |         |
|----------------------------------------------------------|------------|-----------|---------|-----------|-----------|---------|
|                                                          | HR         | 95%CI     | P-value | HR        | 95%CI     | P-value |
| Clinical Characteristics                                 |            |           |         |           |           |         |
| Age, 10 years                                            | 1.86       | 1.58-2.18 | <0.001  | 1.79      | 1.51-2.12 | <0.001  |
| Sex (Male)                                               | 2.04       | 1.38-3    | <0.001  | 1.81      | 1.22-2.67 | 0.003   |
| Deceased Donor                                           | 1.41       | 1.01-1.97 | 0.046   | 1.05      | 0.73-1.51 | 0.809   |
| Period 2006-2009                                         | 1.00       | Ref       | Ref     | 1.00      | Ref       | Ref     |
| Period 2010-2013                                         | 1.53       | 1.02-2.3  | 0.04    | 1.49      | 0.99-2.23 | 0.056   |
| Period 2014-2018                                         | 1.66       | 0.97-2.83 | 0.062   | 1.61      | 0.94-2.76 | 0.082   |
| Prior Kidney Transplant                                  | 0.94       | 0.53-1.66 | 0.828   | -         | -         | -       |
| Dialysis                                                 | 1.62       | 1.11-2.37 | 0.012   | 1.64      | 1.1-2.44  | 0.015   |
| Prednisone Therapy                                       | 1.26       | 0.9-1.78  | 0.181   | -         | -         | -       |
| Induction (thymoglobulin and antiCD25) vs. (Alemtuzumab) | 1.29       | 0.87-1.9  | 0.202   | -         | -         | -       |
| Donor age, 10 years                                      | 1.16       | 1.03-1.31 | 0.018   | 1.05      | 0.93-1.18 | 0.473   |
| Donor Gender                                             | 0.95       | 0.68-1.32 | 0.753   | -         | -         | -       |
| HLA number Mismatch (A, B, DR)                           | 0.99       | 0.9-1.09  | 0.83    | -         | -         | -       |
| Donor Black race                                         | 0.60       | 0.26-1.35 | 0.214   | -         | -         | -       |
| Recipient Black race                                     | 0.96       | 0.57-1.62 | 0.88    | -         | -         | -       |
| Diabetes Mellitus as Cause of ESRD                       | 1.81       | 1.25-2.61 | 0.002   | 1.28      | 0.88-1.86 | 0.19    |
| Delayed Graft Function                                   | 1.06       | 0.66-1.71 | 0.801   | -         | -         | -       |
| HLA A, B mismatch                                        | 1.03       | 0.9-1.17  | 0.686   | -         | -         | -       |
| HLA DR Mismatch                                          | 0.86       | 0.68-1.09 | 0.208   | -         | -         | -       |
| CPRA $\geq$ 80% (only in 4941)                           | 0.77       | 0.36-1.66 | 0.507   | -         | -         | -       |

ESRD: End Stage Renal Disease; DGF: Delayed Graft Function; CPRA: Calculated Panel Reactive Antibody; HLA: Human Leukocyte Antigen.

\* Adjusted for recipient age, sex, deceased donor, period of transplant, donor age and diabetes

mellitus as a pre-transplant cause of ESRD

**Table S4. Multivariable Analysis for infection as a cause for death with functioning graft**

| Infection As Cause Of Death                              | Unadjusted |           |         | Adjusted* |           |         |
|----------------------------------------------------------|------------|-----------|---------|-----------|-----------|---------|
|                                                          | HR         | 95%CI     | P-value | HR        | 95%CI     | P-value |
| Clinical Characteristics                                 |            |           |         |           |           |         |
| Age, 10 years                                            | 2.14       | 1.8-2.54  | <0.001  | 1.93      | 1.59-2.33 | <0.001  |
| Sex (Male)                                               | 1.26       | 0.88-1.79 | 0.207   |           |           |         |
| Deceased Donor                                           | 2.08       | 1.47-2.94 | <0.001  | 1.46      | 0.95-2.24 | 0.087   |
| Period 2006-2009                                         | 1.00       | Ref       | Ref     | 1.00      | Ref       | Ref     |
| Period 2010-2013                                         | 1.12       | 0.73-1.72 | 0.607   | -         | -         | -       |
| Period 2014-2018                                         | 1.28       | 0.79-2.09 | 0.316   | -         | -         | -       |
| Prior Kidney Transplant                                  | 0.94       | 0.53-1.67 | 0.842   | -         | -         | -       |
| Dialysis                                                 | 1.88       | 1.25-2.8  | 0.002   | 1.75      | 1.14-2.68 | 0.011   |
| Prednisone Therapy                                       | 1.92       | 1.33-2.78 | <0.001  | 1.81      | 1.13-2.91 | 0.013   |
| Induction (thymoglobulin and antiCD25) vs. (Alemtuzumab) | 1.87       | 1.23-2.84 | 0.003   | 0.83      | 0.49-1.4  | 0.491   |
| Donor age, 10 years                                      | 1.27       | 1.12-1.44 | <0.001  | 1.12      | 0.99-1.27 | 0.065   |
| Donor Gender                                             | 1          | 0.72-1.41 | 0.977   | -         | -         | -       |
| HLA number Mismatch (A, B, DR)                           | 1.13       | 1.01-1.25 | 0.026   | 1.07      | 0.82-1.41 | 0.606   |
| Donor Black race                                         | 0.79       | 0.38-1.61 | 0.508   | -         | -         | -       |
| Recipient Black race                                     | 0.88       | 0.51-1.5  | 0.634   | -         | -         | -       |
| Diabetes Mellitus as Cause of ESRD                       | 2.19       | 1.53-3.12 | <0.001  | 1.55      | 1.07-2.23 | 0.02    |
| Delayed Graft Function                                   | 1.55       | 1.03-2.33 | 0.037   | 0.93      | 0.59-1.46 | 0.745   |
| HLA A, B mismatch                                        | 1.16       | 1.01-1.33 | 0.039   | -         | -         | -       |
| HLA DR Mismatch                                          | 1.24       | 0.97-1.58 | 0.081   | -         | -         | -       |
| CPRA $\geq$ 80% (only in 4941)                           | 1.09       | 0.57-2.1  | 0.792   | -         | -         | -       |

ESRD: End Stage Renal Disease; DGF: Delayed Graft Function; CPRA: Calculated Panel Reactive Antibody; HLA: Human Leukocyte Antigen.

\* Adjusted for recipient age, deceased donor, dialysis pre-transplant, prednisone, induction,

HLA mismatch, donor age, Delayed Graft Function and diabetes mellitus as a pre-transplant

cause of ESRD

**Table S5. Assignment and agreement of causes of graft loss between physicians.**

|               | Total Assigned | First Assigned Cause Agreement Between MD1 and MD2) | First Disagreement | Assigned Cause by 3 <sup>rd</sup> MD | Assigned Cause by 4 <sup>th</sup> MD |
|---------------|----------------|-----------------------------------------------------|--------------------|--------------------------------------|--------------------------------------|
| Alloimmune    | 214            | 186                                                 | 28                 | 19                                   | 9                                    |
| Glomerular    | 103            | 92                                                  | 11                 | 8                                    | 3                                    |
| Renal Tubular | 77             | 56                                                  | 21                 | 17                                   | 4                                    |
| BK            | 24             | 21                                                  | 3                  | 1                                    | 2                                    |
| Anatomic      | 79             | 71                                                  | 8                  | 8                                    | 0                                    |
| Other         | 56             | 36                                                  | 20                 | 16                                   | 4                                    |
| Total         | 553            | 462                                                 | 91                 | 69                                   | 22                                   |

**Table S6. Specific causes of graft losses**

| Causes of allograft loss                                                              | N   | Catego<br>ries |
|---------------------------------------------------------------------------------------|-----|----------------|
| 1. Alloimmune= Cause of failure due to rejection                                      | 214 |                |
| 1.1 Acute Cellular Rejection or chronic active cellular rejection                     | 44  | 20.6%          |
| 1.2 Acute Active Antibody-Mediated Rejection                                          | 2   | 0.9%           |
| 1.3 Mixed Acute Cellular Rejection and Active Antibody-Mediated Rejection             | 55  | 25.7%          |
| 1.4 Chronic Active Antibody-Mediated Rejection                                        | 71  | 33.2%          |
| 1.5 Chronic Active Antibody-Mediated Rejection and Acute Cellular Rejection           | 42  | 19.6%          |
| 2. Glomerular Disease                                                                 | 103 |                |
| 2.1 Recurrent Glomerulonephritis                                                      | 61  | 59.2%          |
| 2.2 De novo Glomerulonephritis                                                        | 10  | 9.7%           |
| 2.3 Diabetic Nephropathy without any other cause                                      | 15  | 14.6%          |
| 2.4 Thrombotic Microangiopathy                                                        | 17  | 16.5%          |
| 3. Renal Tubular Injury                                                               | 77  |                |
| 3.1 One episode of Acute Tubular Necrosis                                             | 13  | 16.9%          |
| 3.2 Recurrent episodes of Acute Tubular Necrosis due to infection                     | 30  | 39.0%          |
| 3.3 Recurrent episodes of Acute Tubular Necrosis due to hypovolemia                   | 11  | 14.3%          |
| 3.4 Nephrotoxic medication (other than CNI e.g. Amphotericin B, contrast nephropathy) | 1   | 1.3%           |
| 3.5 Calcineurin inhibitor toxicity that does not have a second insult                 | 0   | 0.0%           |
| 3.6 Oxalate Nephropathy                                                               | 3   | 3.9%           |
| 3.7 Other recurrent episodes of Acute Tubular Necrosis                                | 5   | 6.5%           |
| 3.8 Secondary to Cardiorenal Syndrome                                                 | 12  | 15.6%          |
| 3.9 Secondary to Hepatorenal Syndrome                                                 | 2   | 2.6%           |
| 4.0 Surgical/Anatomical complication                                                  | 79  |                |
| 4.1 Vascular thrombosis                                                               | 45  | 57.0%          |
| 4.2 Bleeding                                                                          | 4   | 5.1%           |
| 4.3 Urological complication                                                           | 0   | 0.0%           |
| 4.4 Other complication secondary to infection                                         | 1   | 1.3%           |
| 4.5 Vascular Atherosclerosis                                                          | 1   | 1.3%           |
| 4.6 Primary Dysfunction                                                               | 28  | 35.4%          |

|                                                                       |    |       |
|-----------------------------------------------------------------------|----|-------|
| 5. BK nephropathy                                                     | 24 |       |
| 5.1 Active BK nephropathy                                             | 12 | 50.0% |
| 5.2 Secondary to BK nephropathy not active in last biopsy             | 12 | 50.0% |
| 6. Other                                                              | 56 |       |
| 6.1 CMV nephropathy                                                   | 0  | 0.0%  |
| 6.2 Severe Arteriolar Hyalinosis (without other cause)                | 3  | 5.4%  |
| 6.3 Adenovirus nephritis                                              | 1  | 1.8%  |
| 6.4 Unknown                                                           | 39 | 69.6% |
| 6.5 Dihydroxyadenine crystalline nephropathy                          | 1  | 1.8%  |
| 6.6 Malignancy in the renal allograft (PTLD, urothelial carcinoma...) | 2  | 3.6%  |
| 6.7 Nephroptosis with Vascular torsion                                | 1  | 1.8%  |
| 6.8 Atherosclerosis vascular disease                                  | 4  | 7.1%  |
| 6.9 Suboptimal kidney function that survive greater than 1 year       | 4  | 7.1%  |
| 6.10 Cryptococcus infection of the kidney                             | 1  | 1.8%  |

BK: Polyoma Virus

CMV: Cytomegalovirus

PTLD: Post-Transplant Lymphoproliferative Disease



**Table S7. Multivariable analysis for all Graft Loss**

| Death Censored graft loss                                | Unadjusted |           |         | Adjusted* |           |         |
|----------------------------------------------------------|------------|-----------|---------|-----------|-----------|---------|
|                                                          | HR         | 95%CI     | P-value | HR        | 95%CI     | P-value |
| Clinical Characteristics                                 |            |           |         |           |           |         |
| Age, 10 years                                            | 0.84       | 0.79-0.89 | <0.001  | 0.8       | 0.75-0.85 | <0.001  |
| Sex (Male)                                               | 1.11       | 0.94-1.32 | 0.227   | -         | -         | -       |
| Deceased Donor                                           | 1.9        | 1.6-2.25  | <0.001  | 1.16      | 0.93-1.45 | 0.198   |
| Period 2006-2009                                         | 1          | Ref       | Ref     | 1         | Ref       | Ref     |
| Period 2010-2013                                         | 0.97       | 0.79-1.19 | 0.758   | -         | -         | -       |
| Period 2014-2018                                         | 1          | 0.78-1.27 | 0.972   | -         | -         | -       |
| HLA number Mismatch (A, B, DR)                           | 1.11       | 1.05-1.16 | <0.001  | *         | *         | *       |
| Prior Kidney Transplant                                  | 1.32       | 1.03-1.69 | 0.031   | 1.33      | 1.01-1.74 | 0.042   |
| Dialysis                                                 | 2.39       | 1.93-2.95 | <0.001  | 1.54      | 1.22-1.95 | <0.001  |
| Prednisone Therapy                                       | 0.85       | 0.72-1    | 0.048   | 1.02      | 0.82-1.26 | 0.88    |
| Induction (thymoglobulin and antiCD25) vs. (Alemtuzumab) | 0.83       | 0.69-0.98 | 0.033   | 1.05      | 0.84-1.3  | 0.671   |
| Donor age, 10 years                                      | 1.04       | 0.98-1.1  | 0.216   | -         | -         | -       |
| Donor Gender                                             | 0.92       | 0.78-1.08 | 0.308   | -         | -         | -       |
| Donor Black Race                                         | 1.65       | 1.27-2.14 | <0.001  | 1.35      | 1.02-1.78 | 0.038   |
| Recipient Black Race                                     | 1.9        | 1.55-2.33 | <0.001  | 1.4       | 1.1-1.79  | 0.006   |
| Diabetes Mellitus as Cause of ESRD                       | 1.48       | 1.23-1.79 | <0.001  | 1.4       | 1.14-1.72 | 0.002   |
| Delayed Graft Function                                   | 3.18       | 2.67-3.8  | <0.001  | 2.2       | 1.78-2.73 | <0.001  |
| HLA A, B mismatch                                        | 1.11       | 1.04-1.19 | 0.002   | 0.97      | 0.89-1.05 | 0.431   |
| HLA DR Mismatch                                          | 1.27       | 1.13-1.43 | <0.001  | 1.27      | 1.11-1.45 | <0.001  |
| CPRA≥80% (only in 4941)                                  | 1.32       | 0.97-1.78 | 0.078   | -         | -         | -       |

ESRD: End Stage Renal Disease; DGF: Delayed Graft Function; CPRA: Calculated Panel Reactive Antibody; HLA: Human Leukocyte Antigen.

\* Adjusted for age, deceased donor, HLA A,B mismatch, HLA DR mismatch, induction, dialysis pre-transplant, prednisone therapy, prior kidney transplant, donor race, recipient race, delayed graft functioning, diabetes mellitus as a cause pre-transplant of ESRD and transplant site

**Table S8. Multivariable analysis for Alloimmune Causes**

| Alloimmune causes                                        | Unadjusted |           |         | Adjusted* |           |         |
|----------------------------------------------------------|------------|-----------|---------|-----------|-----------|---------|
|                                                          | HR         | 95%CI     | P-value | HR        | 95%CI     | P-value |
| Clinical Characteristics                                 |            |           |         |           |           |         |
| Age, 10 years                                            | 0.64       | 0.58-0.7  | <0.001  | 0.64      | 0.57-0.71 | <0.001  |
| Sex (Male)                                               | 0.86       | 0.66-1.13 | 0.288   | -         | -         | -       |
| Deceased Donor                                           | 1.68       | 1.28-2.2  | <0.001  | 1.6       | 1.05-2.44 | 0.029   |
| Period 2006-2009                                         | 1.00       | Ref       | Ref     | 1.00      | Ref       | Ref     |
| Period 2010-2013                                         | 1.04       | 0.75-1.42 | 0.829   | -         | -         | -       |
| Period 2014-2018                                         | 1          | 0.66-1.52 | 0.984   | -         | -         | -       |
| HLA number Mismatch (A, B, DR)                           | 1.21       | 1.11-1.32 | <0.0001 | -         | -         | -       |
| Prior Kidney Transplant                                  | 1.58       | 1.08-2.3  | 0.017   | 1.03      | 0.63-1.69 | 0.914   |
| Dialysis                                                 | 2.89       | 2.02-4.14 | <0.001  | 2.15      | 1.34-3.46 | 0.001   |
| Prednisone Therapy                                       | 0.89       | 0.68-1.16 | 0.374   | -         | -         | -       |
| Induction (thymoglobulin and antiCD25) vs. (Alemtuzumab) | 0.76       | 0.57-1.01 | 0.06    | -         | -         | -       |
| Donor age, 10 years                                      | 0.95       | 0.86-1.04 | 0.257   | -         | -         | -       |
| Donor Gender                                             | 1.68       | 1.28-2.2  | <0.001  | 1.60      | 1.05-2.44 | 0.029   |
| Donor Black race                                         | 1.03       | 0.62-1.72 | 0.9     | -         | -         | -       |
| Recipient Black race                                     | 2.31       | 1.69-3.16 | <0.001  | 1.79      | 1.19-2.7  | 0.005   |
| Diabetes Mellitus as Cause of ESRD                       | 1.08       | 0.78-1.51 | 0.643   | -         | -         | -       |
| Delayed Graft Function                                   | 2.05       | 1.5-2.81  | <0.001  | 1.27      | 0.85-1.91 | 0.251   |
| HLA A, B mismatch                                        | 1.22       | 1.09-1.36 | <0.001  | 1.00      | 0.83-1.16 | 0.963   |
| HLA DR Mismatch                                          | 1.6        | 1.31-1.95 | <0.001  | 1.56      | 1.21-2.01 | 0.0006  |
| CPRA $\geq$ 80 (only in 4941)                            | 2.61       | 1.75-3.87 | <0.001  | 2.19      | 1.37-3.48 | <0.001  |

ESRD: End Stage Renal Disease; DGF: Delayed Graft Function; CPRA: Calculated Panel Reactive Antibody; HLA: Human Leukocyte Antigen.

\* Adjusted for age, deceased donor, HLA A, B mismatch, HLA DR mismatch, dialysis pre-transplant, prior kidney transplant, recipient race, delayed graft functioning, diabetes mellitus as a cause pre-transplant of ESRD, CPRA $\geq$ 80%

**Table S9. Multivariable analysis for Renal Tubular Injuries Causes**

| Renal Tubular injuries                                   | Unadjusted |           |         | Adjusted* |           |         |
|----------------------------------------------------------|------------|-----------|---------|-----------|-----------|---------|
|                                                          | HR         | 95%CI     | P-value | HR        | 95%CI     | P-value |
| Clinical Characteristics                                 |            |           |         |           |           |         |
| Age, 10 years                                            | 1.32       | 1.1-1.58  | 0.003   | 1.10      | 0.91-1.37 | 0.295   |
| Sex (Male)                                               | 1.04       | 0.66-1.65 | 0.863   | -         | -         | -       |
| Deceased Donor                                           | 2.41       | 1.51-3.85 | <0.001  | 1.75      | 0.94-3.25 | 0.075   |
| Period 2006-2009                                         | 1.00       | Ref       | Ref     | 1.00      | Ref       | Ref     |
| Period 2010-2013                                         | 0.92       | 0.51-1.66 | 0.784   | -         | -         | -       |
| Period 2014-2018                                         | 1.8        | 0.96-3.38 | 0.066   | -         | -         | -       |
| Prior Kidney Transplant                                  | 1.04       | 0.5-2.16  | 0.916   | -         | -         | -       |
| Dialysis                                                 | 2.17       | 1.25-3.77 | 0.006   | 1.44      | 0.78-2.66 | 0.247   |
| Prednisone Therapy                                       | 0.96       | 0.61-1.5  | 0.841   | -         | -         | -       |
| Induction (thymoglobulin and antiCD25) vs. (Alemtuzumab) | 0.86       | 0.54-1.39 | 0.549   | -         | -         | -       |
| Donor age, 10 years                                      | 1.33       | 1.12-1.57 | 0.001   | 1.27      | 1.07-1.5  | 0.006   |
| Donor Gender                                             | 1.34       | 0.86-2.11 | 0.198   | -         | -         | -       |
| HLA number Mismatch (A, B, DR)                           | 0.97       | 0.86-1.11 | 0.686   | -         | -         | -       |
| Donor Black race                                         | 1.45       | 0.7-3.02  | 0.316   | -         | -         | -       |
| Recipient Black race                                     | 0.82       | 0.4-1.72  | 0.606   | -         | -         | -       |
| Diabetes Mellitus as Cause of ESRD                       | 3.48       | 2.21-5.47 | <0.001  | 2.41      | 1.49-3.9  | <0.001  |
| Delayed Graft Function                                   | 4.27       | 2.7-6.76  | <0.001  | 2.72      | 1.56-4.76 | <0.001  |
| HLA A, B mismatch                                        | 0.96       | 0.81-1.14 | 0.649   | -         | -         | -       |
| HLA DR Mismatch                                          | 0.97       | 0.71-1.33 | 0.863   | -         | -         | -       |
| CPRA $\geq$ 80% (only in 4941)                           | 0.41       | 0.1-1.67  | 0.211   | -         | -         | -       |

ESRD: End Stage Renal Disease; DGF: Delayed Graft Function; CPRA: Calculated Panel Reactive Antibody; HLA: Human Leukocyte Antigen.

\* Adjusted for age, deceased donor, dialysis pre-transplant, donor age, delayed graft functioning, diabetes mellitus as a cause pre-transplant of ESRD.

**Table S10. Multivariable Analysis for overall Death with Functioning Graft**

| Death with functioning graft                           | Unadjusted |           |         | Adjusted* |           |         |
|--------------------------------------------------------|------------|-----------|---------|-----------|-----------|---------|
|                                                        | HR         | 95%CI     | P-value | HR        | 95%CI     | P-value |
| Clinical Characteristics                               |            |           |         |           |           |         |
| Age, 10 years                                          | 1.91       | 1.78-2.05 | <0.001  | 1.79      | 1.66-1.95 | <0.001  |
| Sex (Male)                                             | 1.53       | 1.3-1.8   | <0.001  | 1.34      | 1.14-1.58 | <0.001  |
| Deceased Donor                                         | 1.73       | 1.48-2.01 | <0.001  | 1.13      | 0.94-1.37 | 0.197   |
| Period 2006-2009                                       | 1          | Ref       | Ref     | 1         | Ref       | Ref     |
| Period 2010-2013                                       | 1.18       | 0.98-1.42 | 0.08    | 1.04      | 0.85-1.28 | 0.696   |
| Period 2014-2018                                       | 1.48       | 1.18-1.87 | <0.001  | 1.23      | 0.96-1.59 | 0.102   |
| Prior Kidney Transplant                                | 0.83       | 0.63-1.08 | 0.163   | -         | -         | -       |
| Dialysis Pretransplant                                 | 1.65       | 1.39-1.95 | <0.001  | 1.49      | 1.24-1.78 | <0.001  |
| Prednisone Therapy                                     | 1.32       | 1.13-1.54 | <0.001  | 1.34      | 1.08-1.67 | 0.008   |
| Induction (thymoglobulin and antiCD25)vs (Alemtuzumab) | 1.46       | 1.22-1.75 | <0.001  | 0.91      | 0.72-1.15 | 0.421   |
| Donor age, 10 years                                    | 1.12       | 1.06-1.18 | <0.001  | 1.02      | 0.97-1.07 | 0.50    |
| Donor Gender                                           | 1.02       | 0.88-1.19 | 0.783   | -         | -         | -       |
| HLA number Mismatch (A, B, DR)                         | 1.02       | 0.97-1.06 | 0.462   | -         | -         | -       |
| Donor African American                                 | 1.03       | 0.77-1.37 | 0.836   | -         | -         | -       |
| Recipient African American                             | 0.92       | 0.73-1.17 | 0.511   | -         | -         | -       |
| Diabetes Mellitus                                      | 2.65       | 2.27-3.09 | <0.001  | 1.88      | 1.6-2.21  | <0.001  |
| DGF                                                    | 1.65       | 1.38-1.99 | <0.001  | 1.1       | 0.89-1.36 | 0.365   |
| HLA AB Mismatch                                        | 1.02       | 0.96-1.08 | 0.45    | -         | -         | -       |
| HLA DR Mismatch                                        | 1.02       | 0.92-1.14 | 0.66    | -         | -         | -       |
| CPRA $\geq$ 80 (only in 4941)                          | 1          | 0.73-1.36 | 0.976   | -         | -         | -       |

ESRD: End Stage Renal Disease; DGF: Delayed Graft Function; CPRA: Calculated Panel Reactive Antibody; HLA: Human Leukocyte Antigen.

\* Adjusted for recipient age, sex, deceased donor, period of transplant, induction, dialysis pretransplant, prednisone therapy, delayed graft functioning, diabetes mellitus as a cause pretransplant of ESRD and transplant site.

**Table S11. Baseline Characteristic comparison between the ones with known cause of death and unknown cause of death**

|                                    | <b>Known COD (N=435)</b> | <b>Unknown COD (N=256)</b> | <b>Total (N=691)</b> | <b>p value</b> |
|------------------------------------|--------------------------|----------------------------|----------------------|----------------|
| <b>Age per 10 years</b>            |                          |                            |                      | 0.559          |
| Mean (SD)                          | 6.247 (1.009)            | 6.295 (1.074)              | 6.265 (1.033)        |                |
| Range                              | 2.700 - 8.200            | 2.300 - 8.400              | 2.300 - 8.400        |                |
| <b>Donor Type</b>                  |                          |                            |                      | 0.073          |
| Mean (SD)                          | 0.520 (0.500)            | 0.590 (0.493)              | 0.546 (0.498)        |                |
| Range                              | 0.000 - 1.000            | 0.000 - 1.000              | 0.000 - 1.000        |                |
| <b>Previous Kidney Transplants</b> |                          |                            |                      | 0.480          |
| Mean (SD)                          | 0.090 (0.286)            | 0.074 (0.263)              | 0.084 (0.277)        |                |
| Range                              | 0.000 - 1.000            | 0.000 - 1.000              | 0.000 - 1.000        |                |
| <b>pretransplant dialysis</b>      |                          |                            |                      | 0.251          |
| Mean (SD)                          | 0.722 (0.449)            | 0.762 (0.427)              | 0.737 (0.441)        |                |
| Range                              | 0.000 - 1.000            | 0.000 - 1.000              | 0.000 - 1.000        |                |
| <b>Steroid Maintenance (1)</b>     |                          |                            |                      | 0.141          |
| Mean (SD)                          | 0.646 (0.479)            | 0.590 (0.493)              | 0.625 (0.484)        |                |
| Range                              | 0.000 - 1.000            | 0.000 - 1.000              | 0.000 - 1.000        |                |

**Figure S1. Flowchart of the study population**

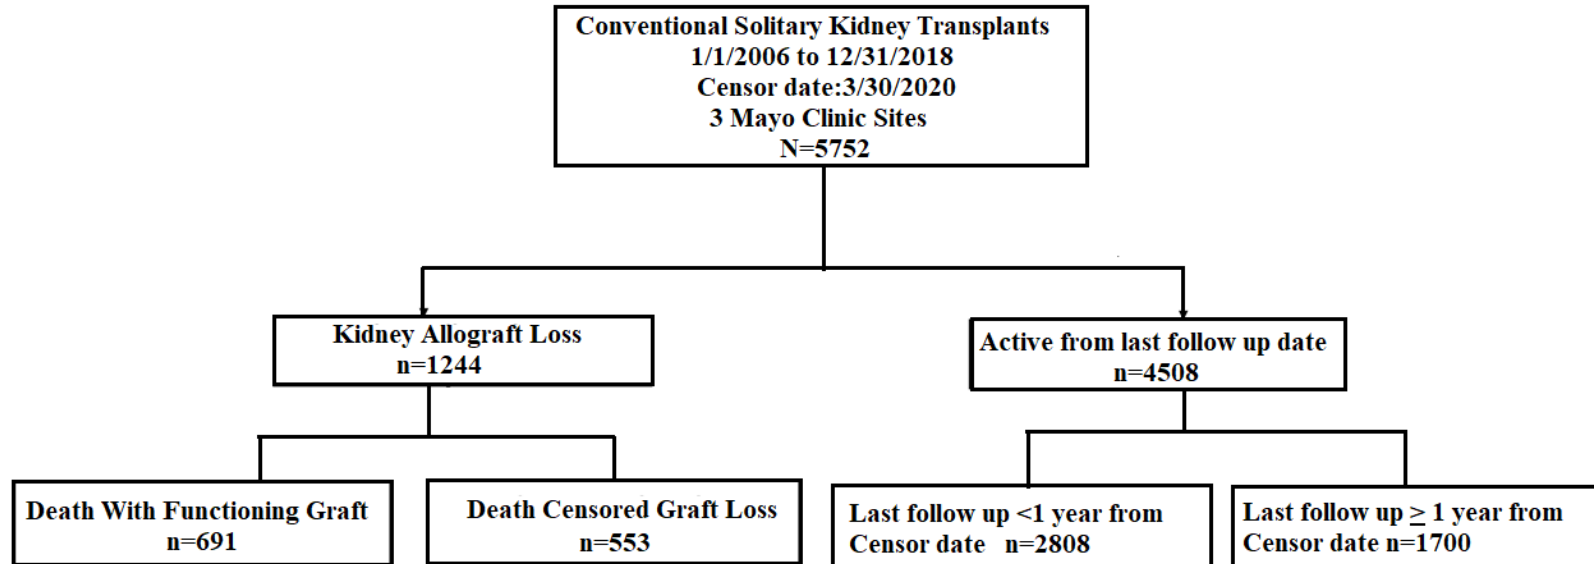

**Figure S2. Causes of Graft Loss during time**

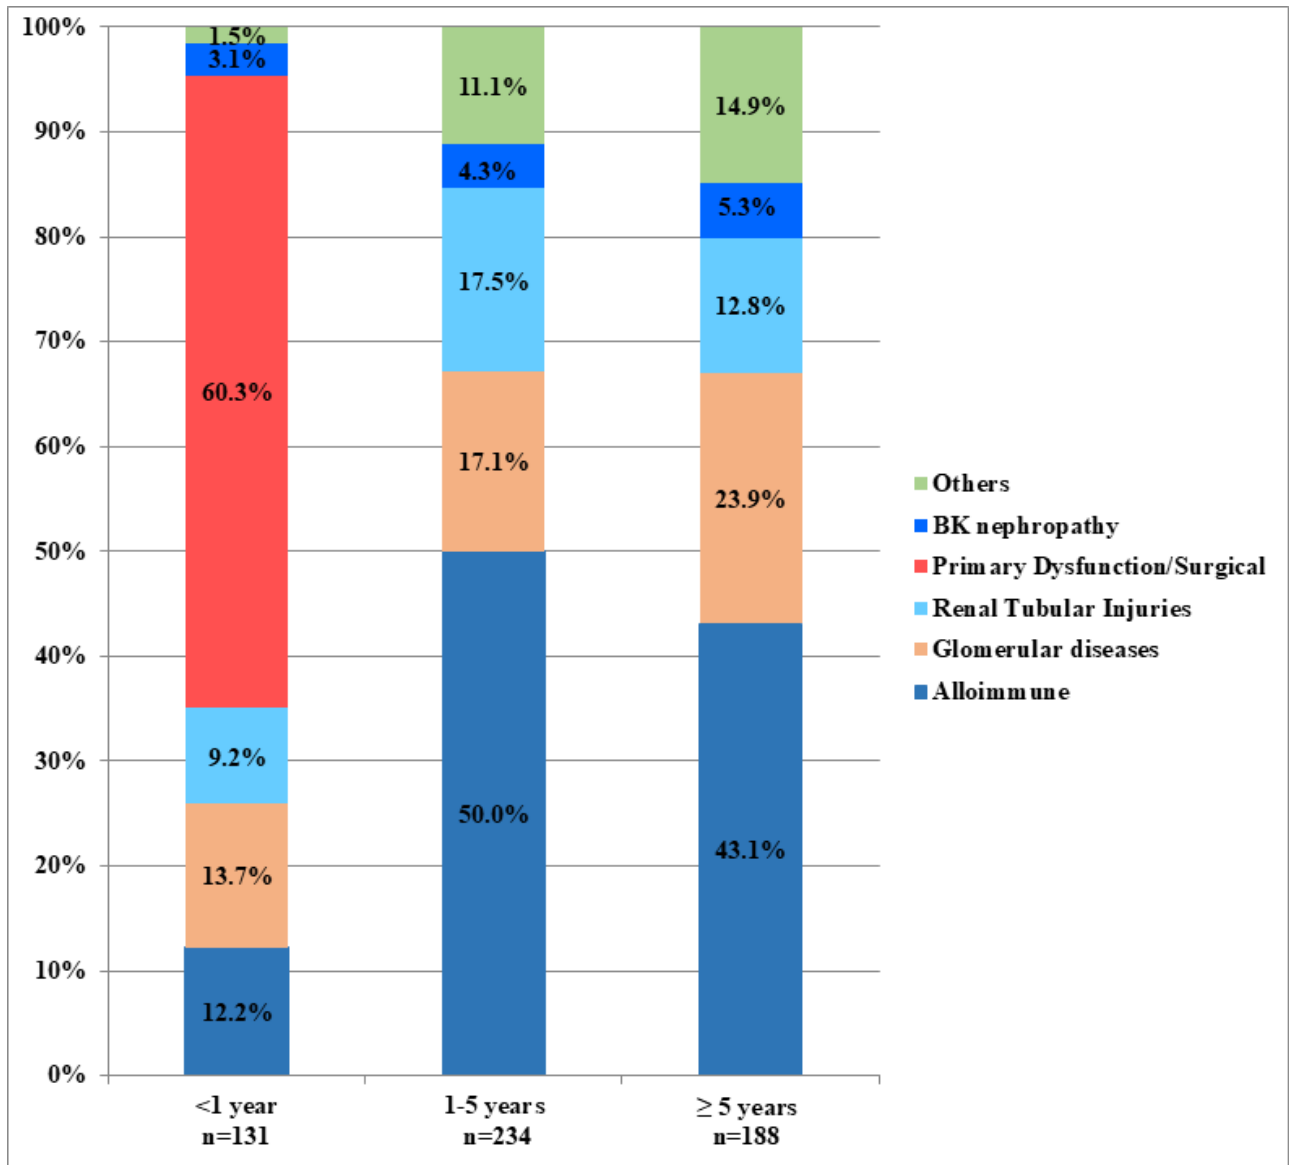

**Figure S3. Comparison of Causes of Allograft Failure in Two Eras.**

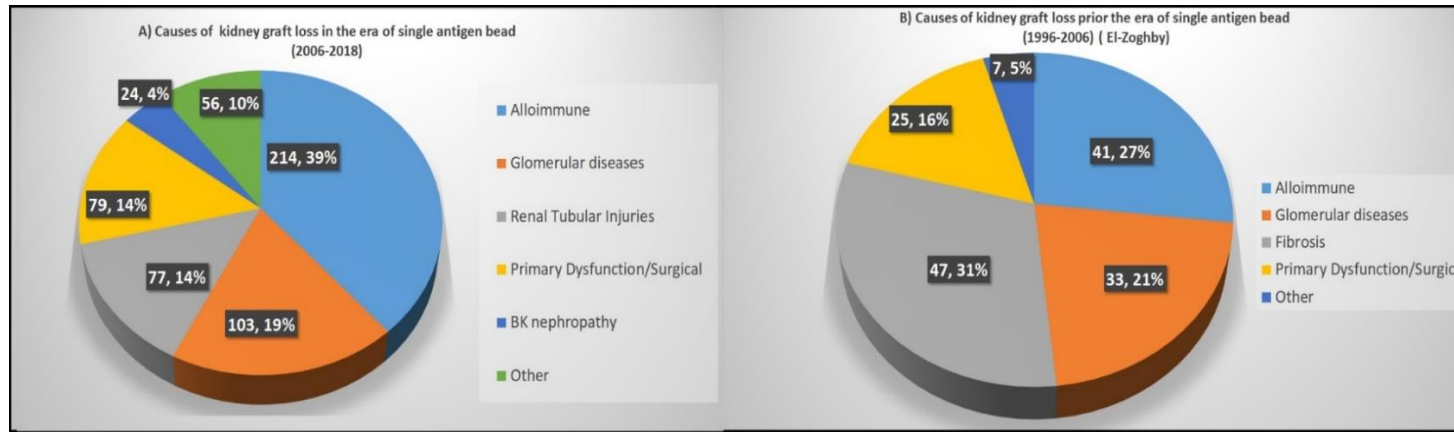

A) Causes of kidney graft loss 2006-2018.

B) Causes of kidney graft loss, single center 1996-2006. (Reference 10)
